# Supplementary material for: Kleptoplasts photoacclimation state modulates the photobehaviour of the solar-powered sea slug Elysia viridis
Source: Oxford University Press journal article supplement (doi:10.1242/jeb.180463), 2018-01-01

**Supplementary Figure S1.** Schematic representation of the 15 cm-long experimental tube used in the sea slug's light preference experiments.

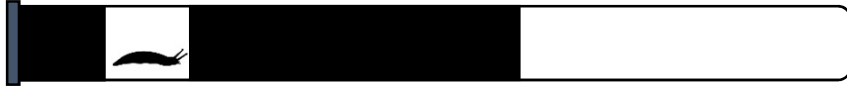

**Supplementary Figure S2.** Opening/closure of parapodia as an effect of light in low ( $LL_{ac}$ ,  $40 \mu\text{mol photons m}^{-2} \text{s}^{-1}$ ) and high light acclimated ( $HL_{ac}$ ,  $200 \mu\text{mol photons m}^{-2} \text{s}^{-1}$ ) *Elysia viridis*. Numbers indicate irradiance in  $\mu\text{mol photons m}^{-2} \text{s}^{-1}$ .

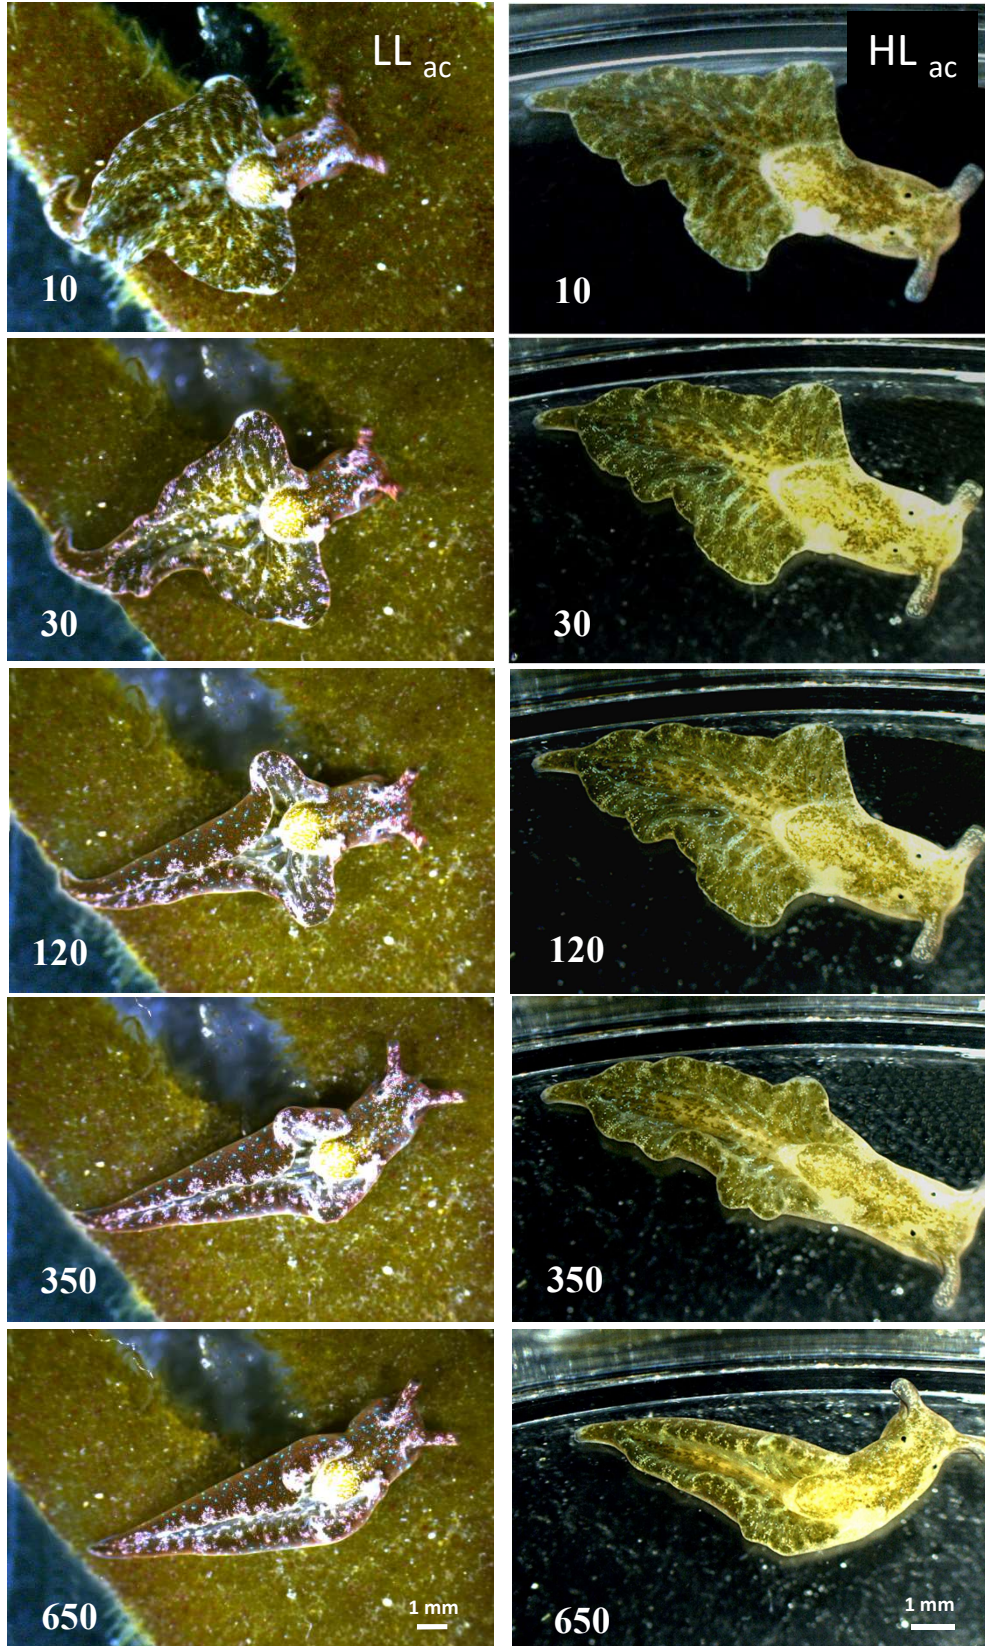

Supplement: jeb180463supp.pdf [file jeb180463supp.pdf]
